# Supplementary material for: HER2-related biomarkers predict clinical outcomes with trastuzumab deruxtecan treatment in patients with HER2-expressing metastatic colorectal cancer: biomarker analyses of DESTINY-CRC01
Source: PubMed Central journal article supplement — Nat Commun. 2024 Nov 25;15:10213. doi: 10.1038/s41467-024-53223-3 (PMC11589615; doi:10.1038/s41467-024-53223-3), 2024-11-25
Supplement: 41467_2024_53223_MOESM1_ESM.pdf [file 41467_2024_53223_MOESM1_ESM.pdf]

# Supplementary Information

Supplementary Fig. S1. Genomic landscape of ctDNA at baseline.

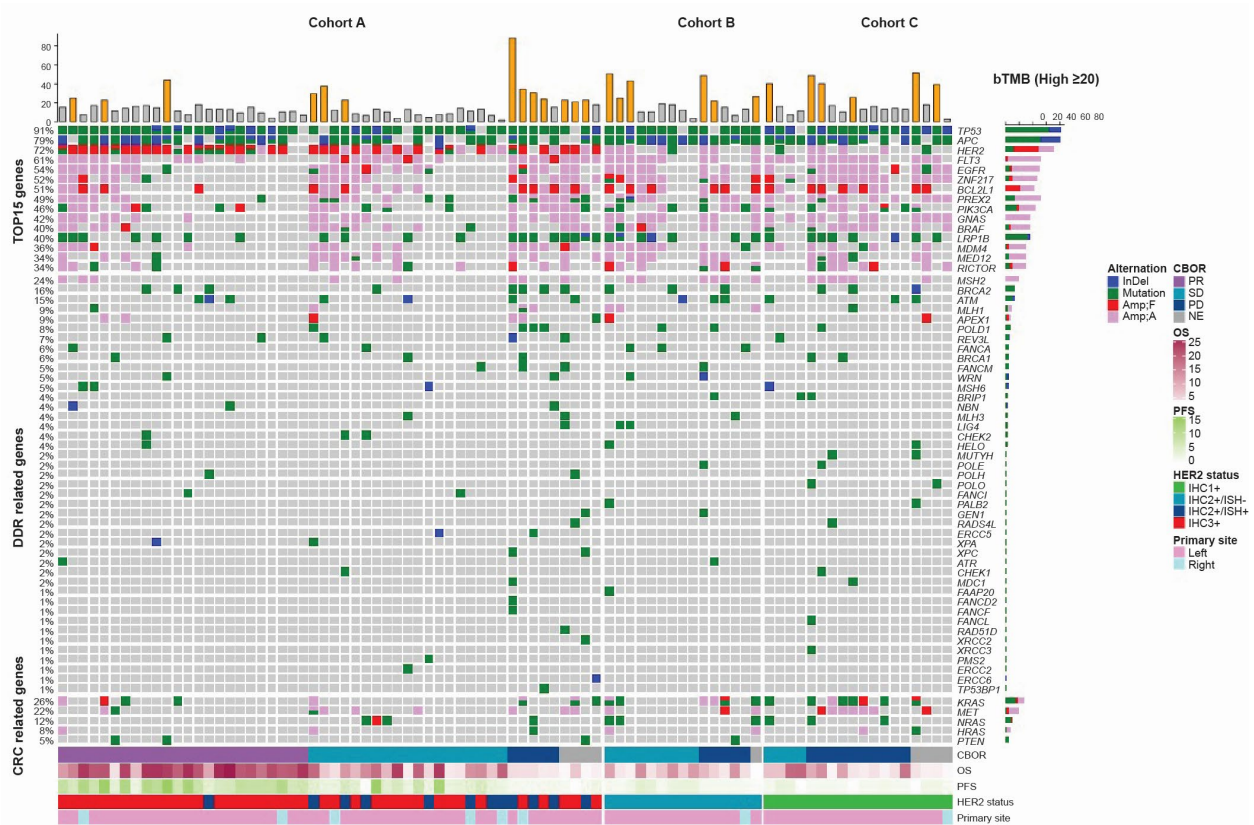

The top bar plot shows bTMB score; yellow bars represent high bTMB (bTMB  $\geq 20$  mut/Mb). Activating and nonactivating mutations are included. Amp, amplification; CBOR, confirmed best overall response; CRC, colorectal cancer; ctDNA, circulating tumor DNA; DDR, DNA damage response and repair; HER2IHC, human epidermal growth factor receptor immunohistochemistry; IHC, immunohistochemistry; ISH, in situ hybridization; NE, not evaluable; OS, overall survival; PD, progressive disease; PFS, progression-free survival; PR, partial response; SD, stable disease; bTMB, blood tumor mutational burden.

**Supplementary Fig. S2.** Relationship between HER2 status and plasma *HER2* amplification status/*HER2* ApCN (all cohorts)

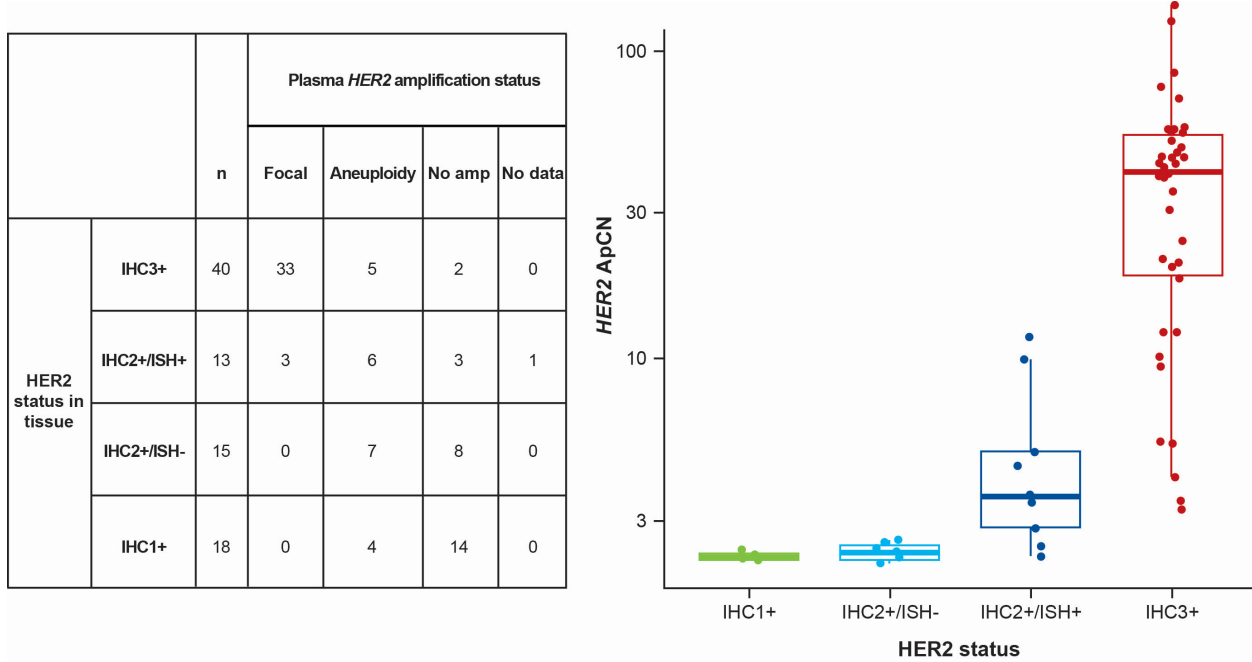

Minimum and maximum, excluding outliers, are represented by the whiskers, the box represents the first and third quarters, the center represents the median, and dots represent individual samples (right panel; n = 58 samples).

Amp, amplification; ApCN, adjusted plasma copy number; ctDNA, circulating tumor DNA; HER2, human epidermal growth factor receptor 2; IHC, immunohistochemistry; ISH, in situ hybridization.

**Supplementary Fig. S3.** Correlation between and HER2/CEP17 ratio and *HER2* plasma copy number/ApCN at baseline

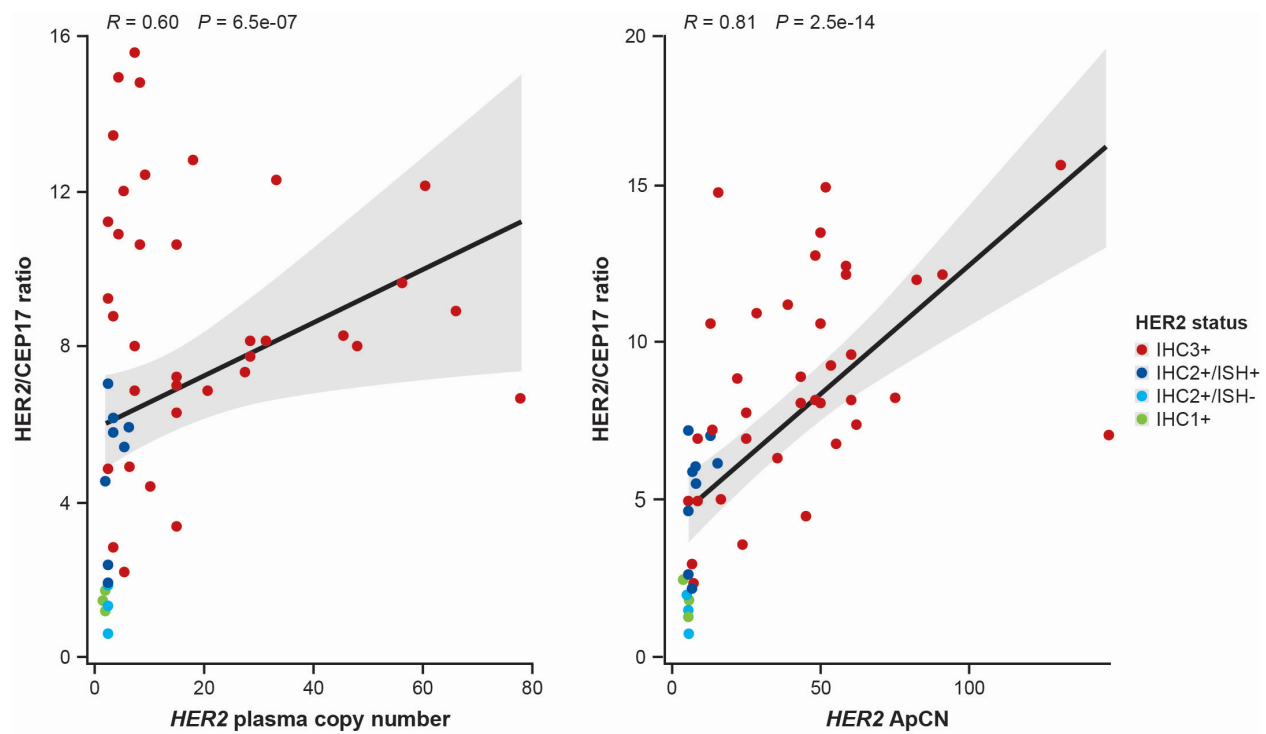

R = Spearman correlation. n = 57 samples.

ApCN, adjusted plasma copy number; CHR, chromosome; HER2, human epidermal growth factor receptor 2; IHC, immunohistochemistry; ISH, in situ hybridization.

**Supplementary Fig. S4.** Relationship between tumor HER2 status and plasma HER2ECD at baseline

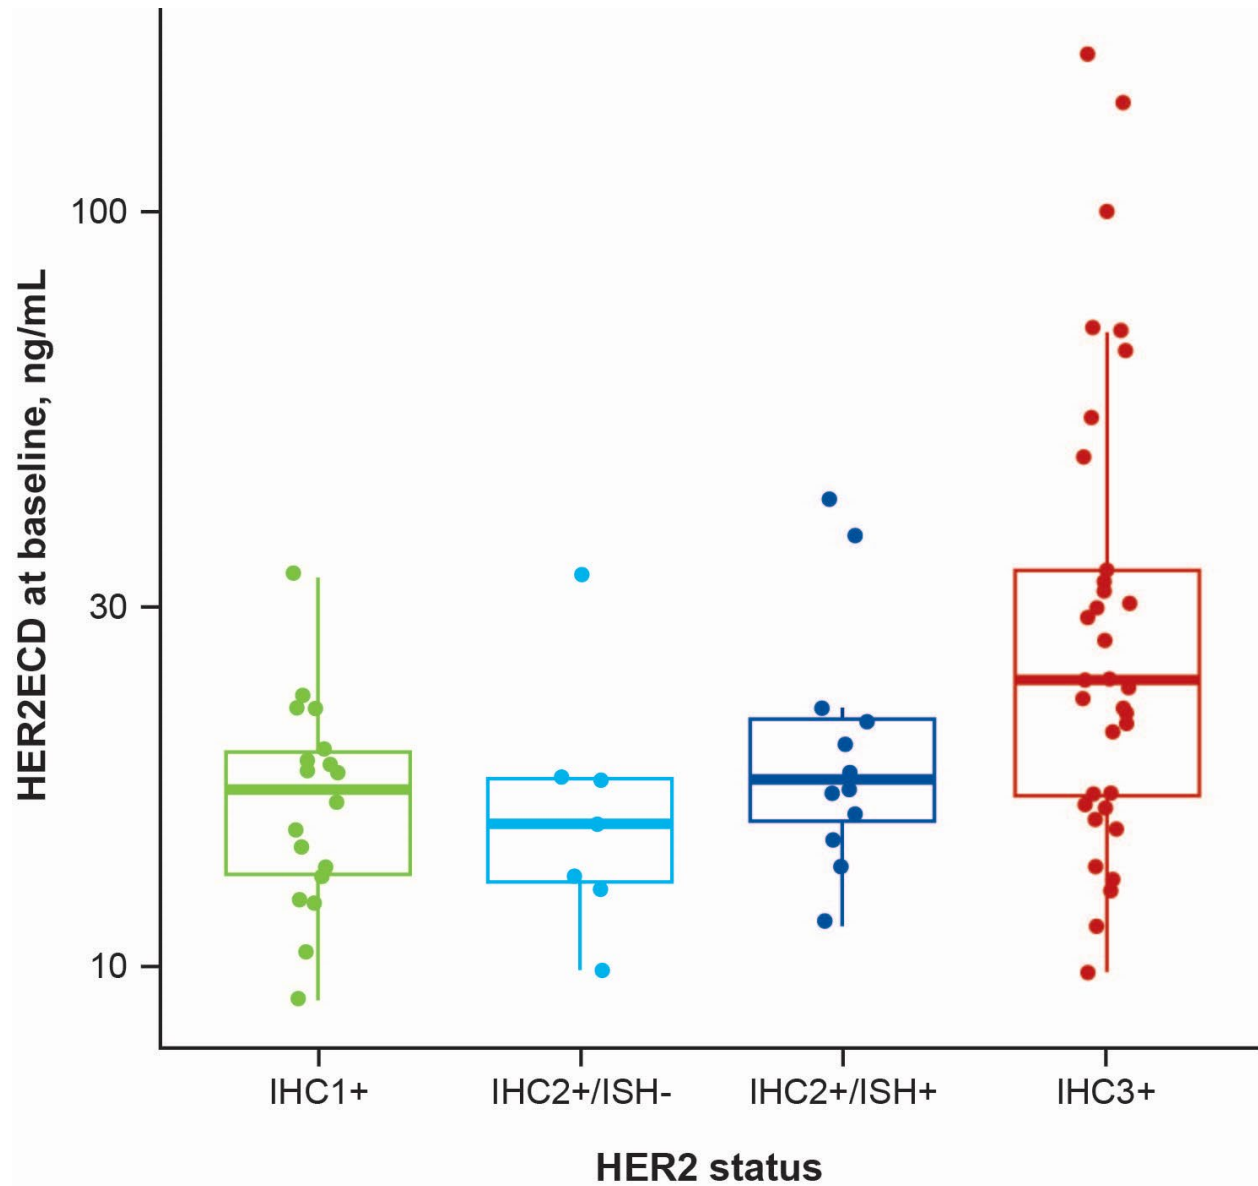

n = 74 samples.

HER2, human epidermal growth factor receptor 2; HER2ECD, human epidermal growth factor receptor 2 extracellular domain; IHC, immunohistochemistry; ISH, in situ hybridization.

**Supplementary Fig. S5.** ROC analysis of HER2 biomarkers at baseline.

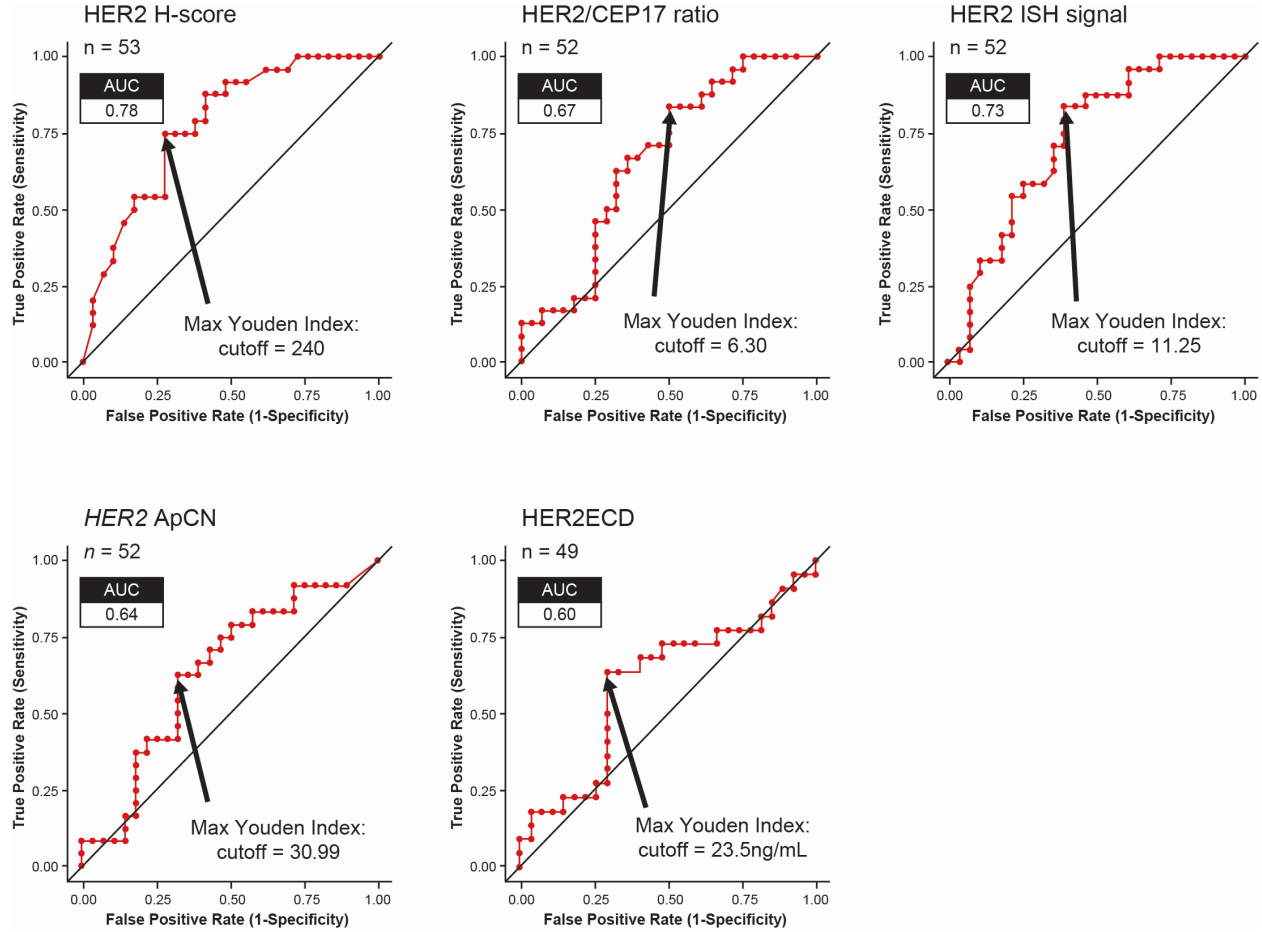

AUC, area under the curve; ApCN, adjusted plasma copy number; ISH, in situ hybridization; HER2, human epidermal growth factor receptor 2; HER2ECD, human epidermal growth factor receptor 2 extracellular domain; pts, patients; ROC, receiver operating characteristics.

**Supplementary Fig. S6.** Antitumor activity of T-DXd according to baseline HER2 biomarker status using medians as cutoff values

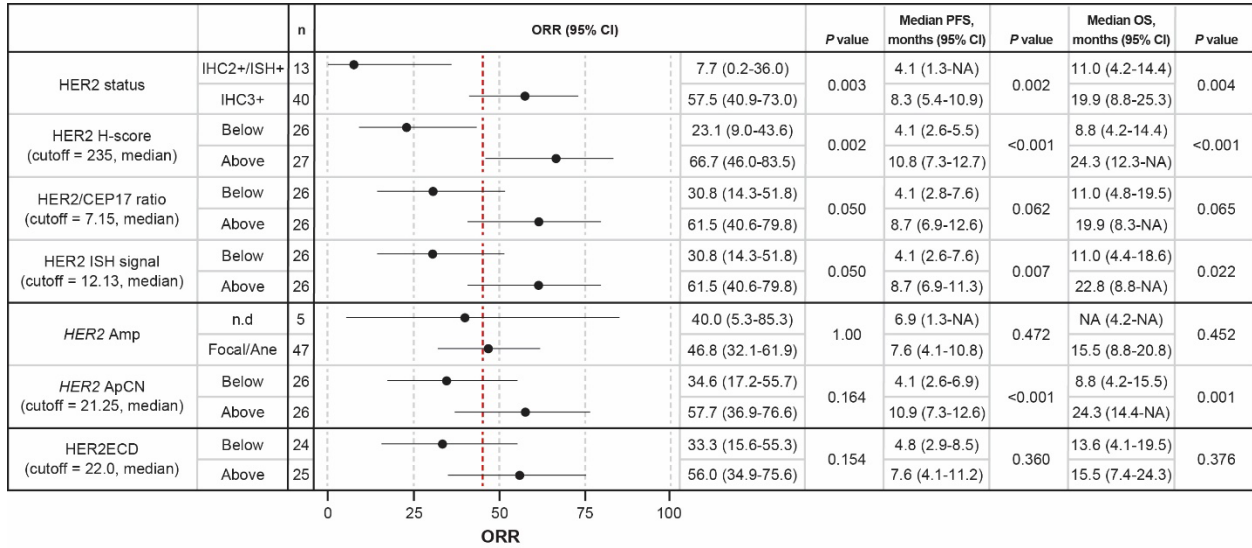

Vertical red dashed line shows the ORR of 45.3% in the overall population for Cohort A. *P* values are based on two-sided Fisher's exact test for ORR and those based on two-sided log-rank test for PFS and OS are shown, without adjustment for multiple comparisons. Error bars represent the 95% CI. The exact *P* values for HER2 H-score for PFS, HER2 H-score for OS, and HER2 ApCN for PFS were 0.000416, 0.000203, and 0.000160, respectively.

Amp, amplification; Ane, aneuploidy; ApCN, adjusted plasma copy number; HER2, human epidermal growth factor receptor 2; HER2ECD, human epidermal growth factor receptor 2 extracellular domain; ISH, in situ hybridization; survival; NA, not applicable; n.d., not determined; ORR, objective response rate; OS, overall survival; PFS, progression-free survival.

**Supplementary Fig. S7.** Change in variant allele fraction during T-DXd treatment in patients with *RAS* or *PIK3CA* mutations

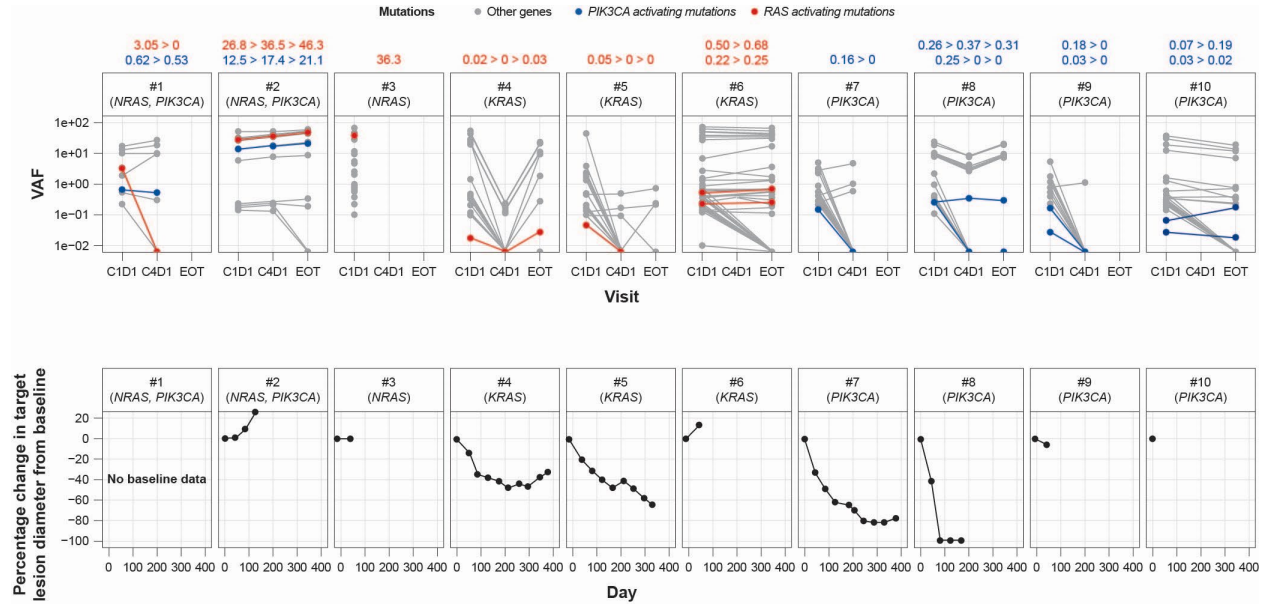

T-DXd, trastuzumab deruxtecan; VAF, variant allele fraction.

**Supplementary Fig. S8. ORR (A) and PFS (B) according to mVAF cutoffs**

**A**

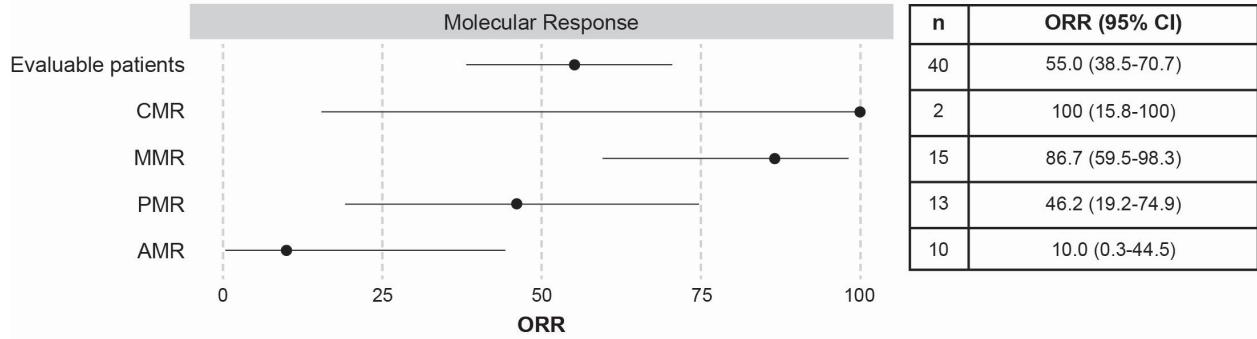

**B**

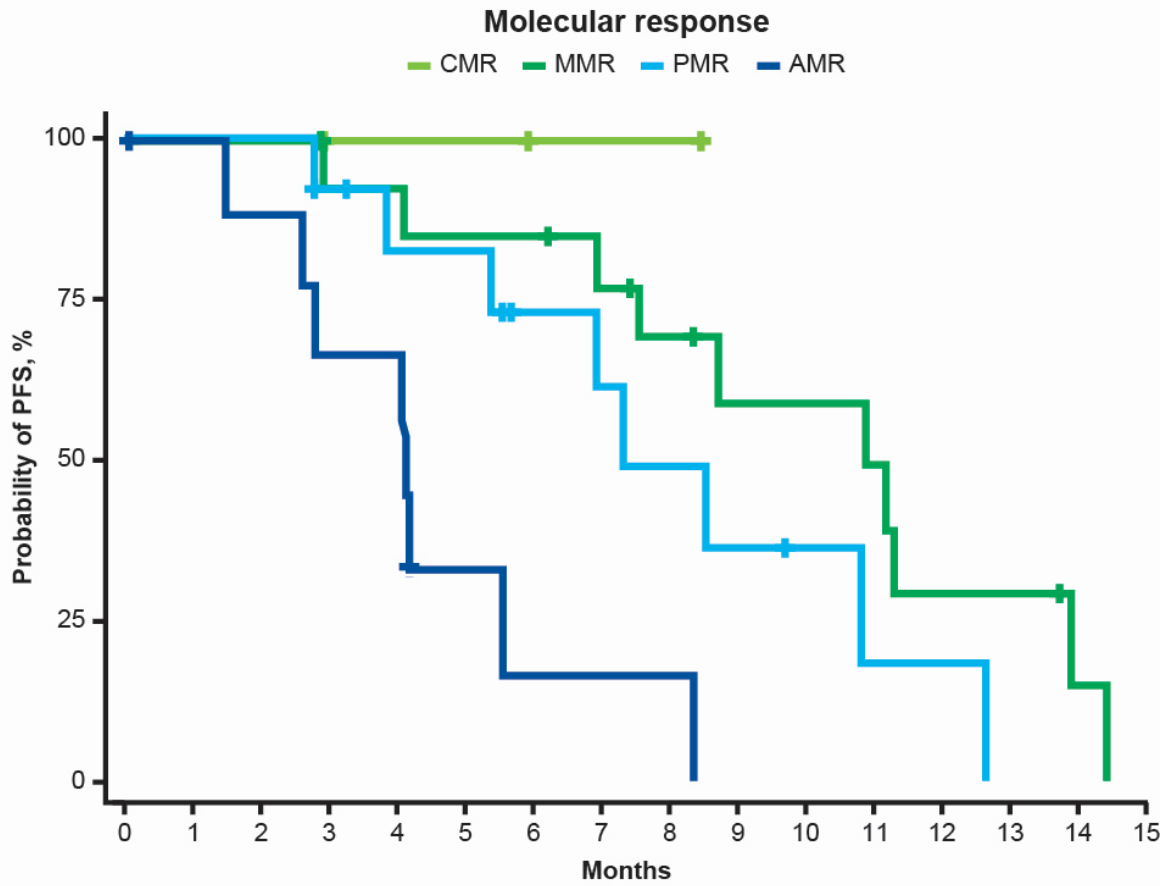

Number at risk

|     |    |    |    |    |    |    |    |    |   |   |   |   |   |   |   |   |
|-----|----|----|----|----|----|----|----|----|---|---|---|---|---|---|---|---|
| CMR | 2  | 2  | 2  | 2  | 2  | 2  | 1  | 1  | 1 | 0 | 0 | 0 | 0 | 0 | 0 |   |
| MMR | 15 | 15 | 15 | 13 | 13 | 12 | 12 | 10 | 8 | 6 | 6 | 5 | 3 | 3 | 1 | 0 |
| PMR | 13 | 13 | 13 | 11 | 9  | 9  | 6  | 5  | 4 | 3 | 2 | 1 | 1 | 0 | 0 | 0 |
| AMR | 10 | 9  | 8  | 6  | 6  | 2  | 1  | 1  | 1 | 0 | 0 | 0 | 0 | 0 | 0 | 0 |



mVAF cutoffs were determined as CMR, 100% reduction of mVAF (nondetectable ctDNA); MMR,  $\geq 90\%$  to  $< 100\%$  reduction in mVAF reduction; PMR,  $\geq 20\%$  to  $< 90\%$  reduction in mVAF; AMR,  $< 20\%$  reduction in mVAF. Error bars (panel A) represent the 95% CI. AMR, absent molecular response; CMR, complete molecular response; ctDNA, circulating tumor DNA; MMR, major molecular response; mVAF, mean variant allele fraction; ORR, objective response rate; PFS, progression-free survival; PMR, partial molecular response.

**Supplementary Fig. S9.** Relationship between change in VAF (a) and outcomes of PFS (b) or ORR (c) at baseline.

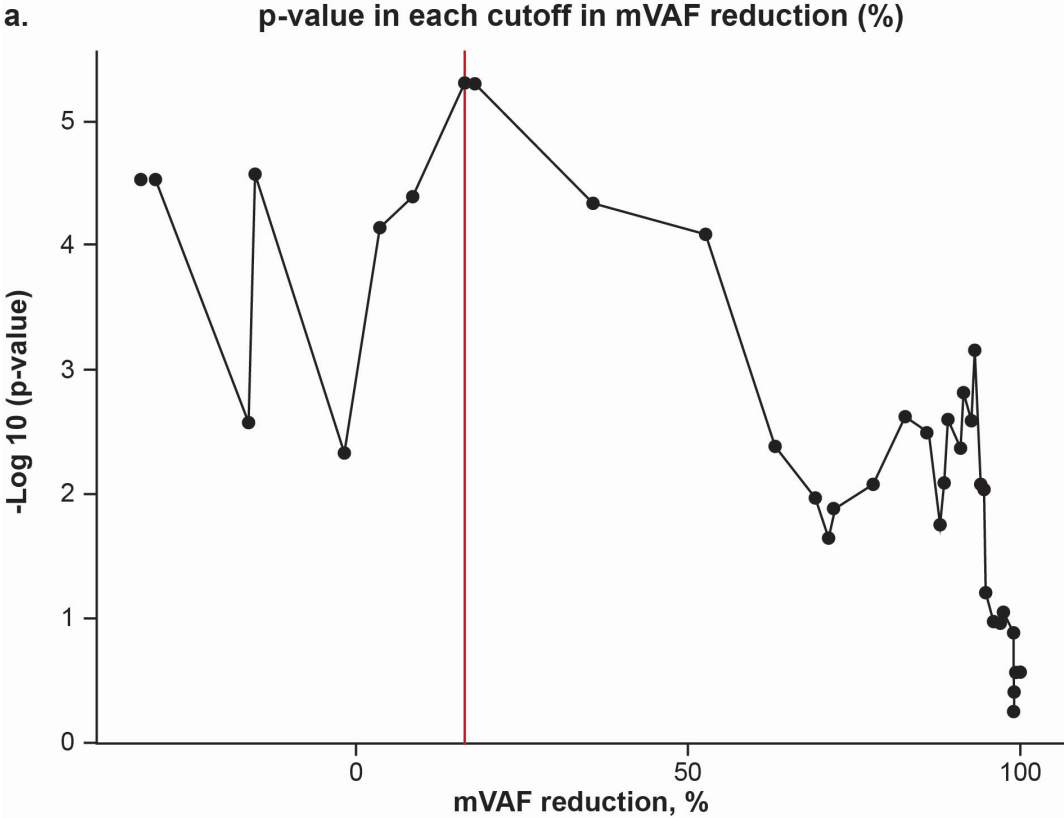

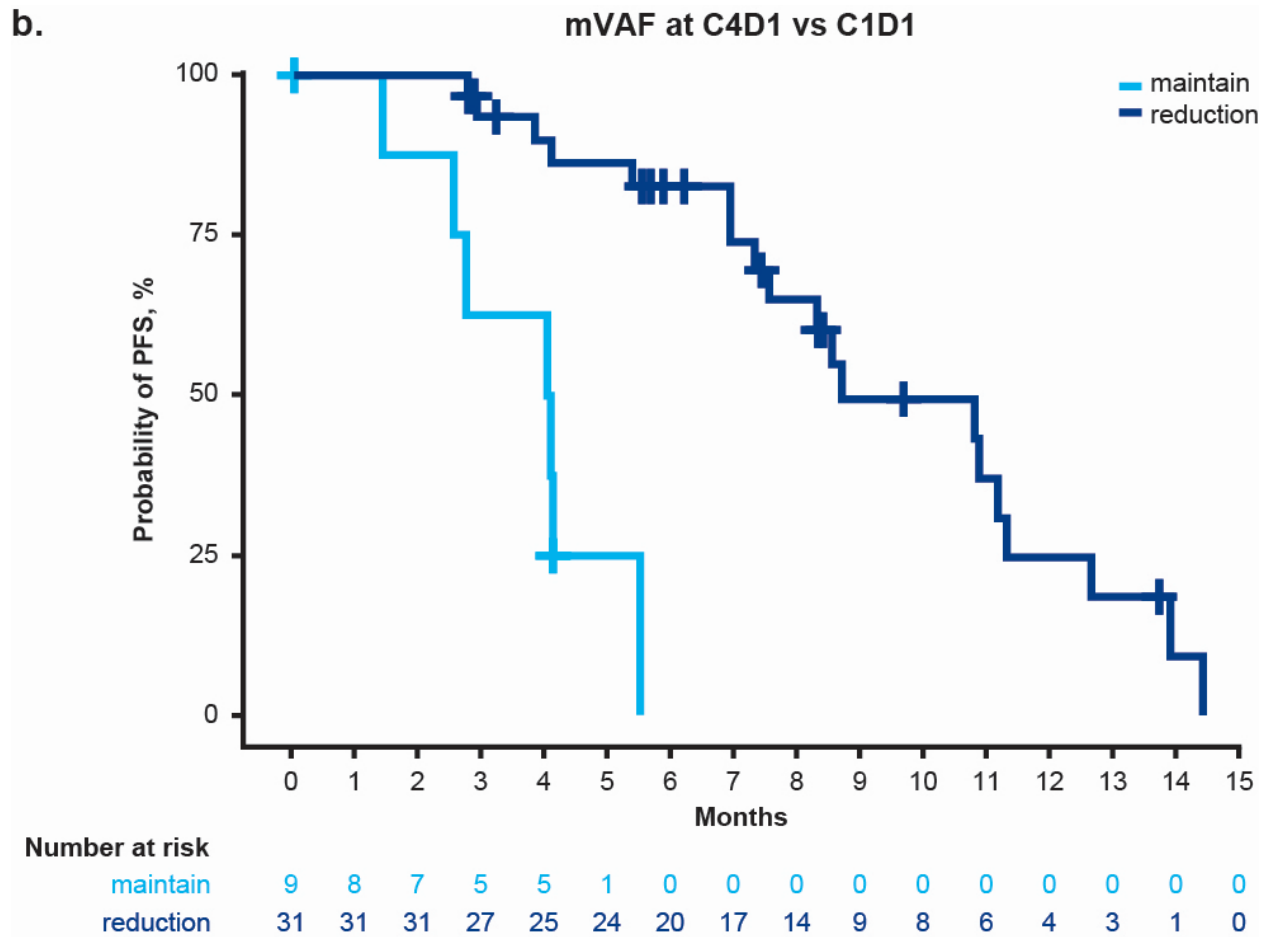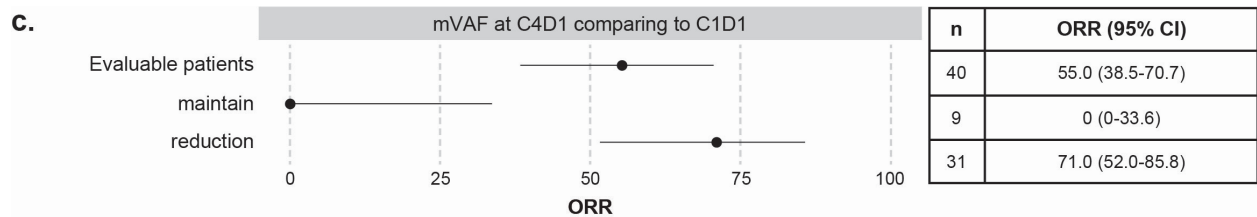

*P* value is based on log-rank test. PFS and ORR are based on the exploratory cutoff mVAF of  $\geq 16.4\%$ . Maintain represents mVAF reduction  $< 16.4\%$  and reduction represents mVAF reduction  $\geq 16.4\%$ . Vertical red line (panel A) shows the cutoff of 16.4% ( $n = 38$  cutoffs). Error bars (panel C) represent the 95% CI.

C, cycle; D, day; mVAF, mean variant allele fraction; ORR, objective response rate; PFS, progression-free survival.

**Supplementary Fig. S10.** Clinical outcomes according to histological grade at baseline (Cohort A)

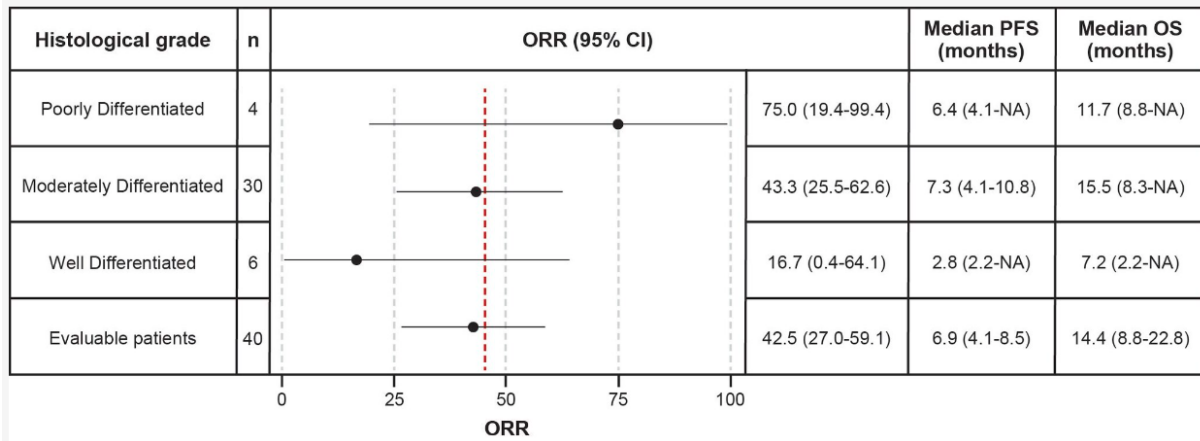

Vertical red dashed line shows the ORR of 45.3% in the overall population for Cohort A (N = 53). Error bars represent the 95% CI.

Analysis included 40 evaluable patients with HER2-positive mCRC (Cohort A).

NA, not applicable; ORR, objective response rate; OS, overall survival; PFS, progression-free survival.

**Supplementary Fig. S11.** Clinical outcomes according to the interval from the last irinotecan dose in cohort A at baseline

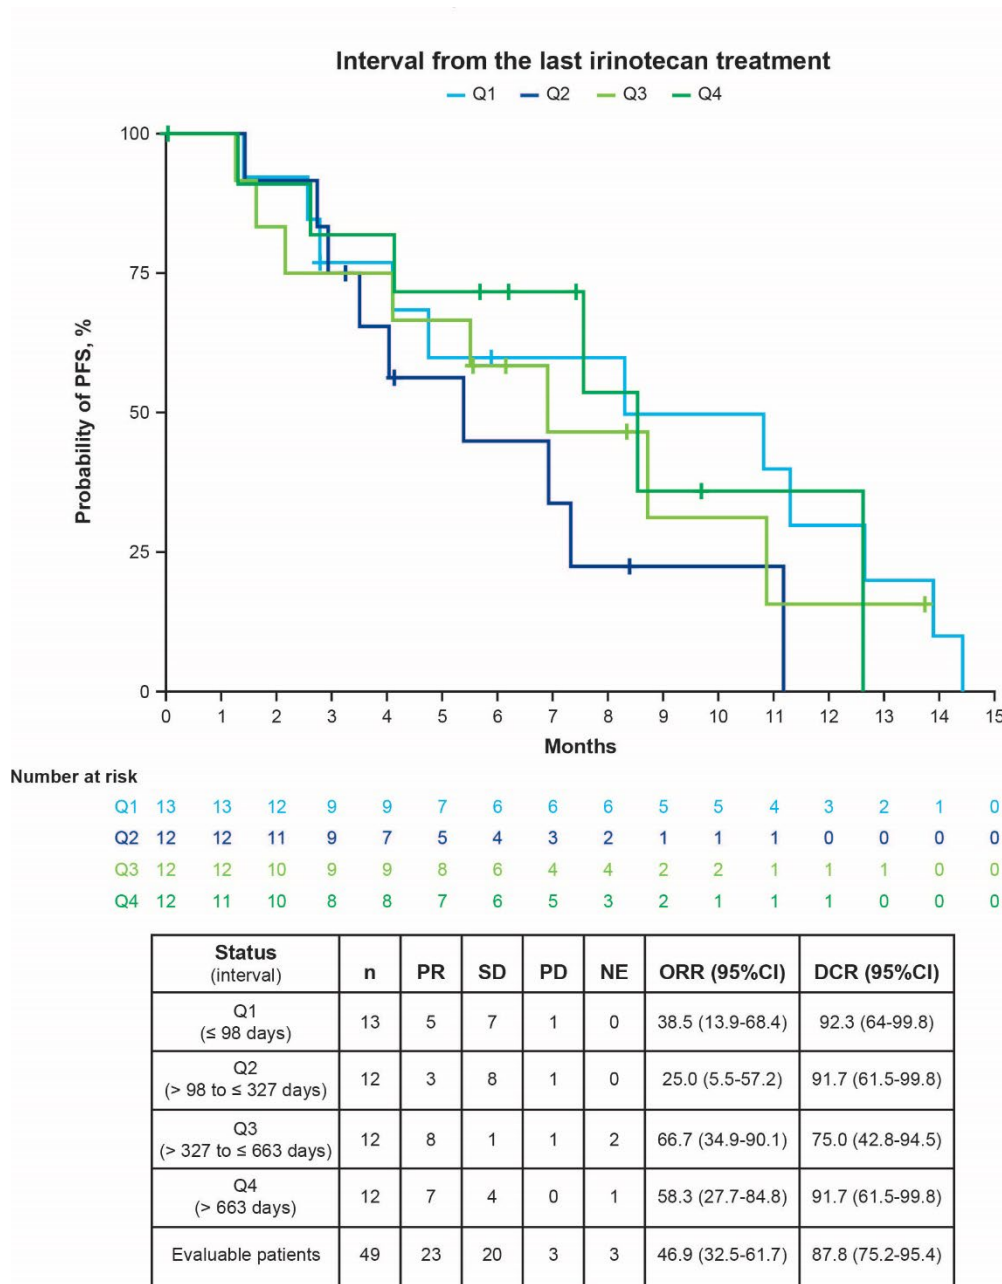

DCR, disease control rate; NE, not evaluable; ORR, objective response rate; PD, progressive disease; PFS, progression-free survival; PR, partial response; Q, quarter; SD, stable disease.

**Supplementary Table S1.** Baseline characteristics for the biomarker datasets and all patients (cohort A)

|                           | <b>HER2ECD Evaluable<br/>Dataset<br/>n = 49</b> | <b>ctDNA Evaluable<br/>Dataset<br/>n = 52</b> | <b>ISH Evaluable Dataset<br/>n = 52</b> | <b>All Patients<br/>N = 53</b> |
|---------------------------|-------------------------------------------------|-----------------------------------------------|-----------------------------------------|--------------------------------|
| Sex, n (%)                |                                                 |                                               |                                         |                                |
| Female                    | 25 (51.0)                                       | 28 (53.8)                                     | 27 (51.9)                               | 28 (52.8)                      |
| Male                      | 24 (49.0)                                       | 24 (46.2)                                     | 25 (48.1)                               | 25 (47.2)                      |
| Age, years                |                                                 |                                               |                                         |                                |
| Mean                      | 57.3                                            | 57.4                                          | 57.4                                    | 57.5                           |
| Median                    | 57.0                                            | 56.5                                          | 56.5                                    | 57.0                           |
| Region, n (%)             |                                                 |                                               |                                         |                                |
| Asia                      | 15 (30.6)                                       | 15 (28.8)                                     | 14 (26.9)                               | 15 (28.3)                      |
| Europe                    | 28 (57.1)                                       | 27 (51.9)                                     | 28 (53.8)                               | 28 (52.8)                      |
| United States             | 6 (12.2)                                        | 10 (19.2)                                     | 10 (19.2)                               | 10 (18.9)                      |
| ECOG PS, n (%)            |                                                 |                                               |                                         |                                |
| 0                         | 34 (69.4)                                       | 37 (71.2)                                     | 36 (69.2)                               | 37 (69.8)                      |
| 1                         | 15 (30.6)                                       | 15 (28.8)                                     | 16 (30.8)                               | 16 (30.2)                      |
| Primary tumor site, n (%) |                                                 |                                               |                                         |                                |
| Left side                 | 43 (87.8)                                       | 46 (88.5)                                     | 46 (88.5)                               | 47 (88.7)                      |
| Right side                | 6 (12.2)                                        | 6 (11.5)                                      | 6 (11.5)                                | 6 (11.3)                       |

ctDNA, circulating tumor DNA; ECOG PS, Eastern Cooperative Oncology Group performance status; HER2ECD, human epidermal growth

factor receptor 2 extracellular domain; ISH, in situ hybridization.

**Supplementary Table S2.** *NRAS/KRAS*, *PIK3CA*, and *HER2* mutations and corresponding VAFs in Cohort A at baseline

| Patient | <i>RAS</i> (VAF)                                    | <i>PIK3CA</i> (VAF)           | <i>HER2</i> (VAF)               | <i>HER2</i> Status | CBOR | Amplification Type | ApCN   |
|---------|-----------------------------------------------------|-------------------------------|---------------------------------|--------------------|------|--------------------|--------|
| 1       | <i>NRAS</i> G12D (36.34)                            | NA                            | NA                              | IHC 2+/ISH+        | PD   | No Amp             | NA     |
| 2       | <i>NRAS</i> Q61R (3.05)                             | C420R (0.62)                  | NA                              | IHC 2+/ISH+        | SD   | Aneuploidy         | 3.52   |
| 3       | <i>NRAS</i> Q61R (26.81)                            | E542K (12.49)                 | NA                              | IHC 3+             | SD   | Aneuploidy         | 3.37   |
| 4       | <i>KRAS</i> G12S (0.02)                             | NA                            | NA                              | IHC 3+             | PR   | Focal              | 56.25  |
| 5       | <i>KRAS</i> Q61H (0.05)                             | NA                            | T862A (43.64)                   | IHC 3+             | PR   | Aneuploidy         | 3.59   |
| 6       | <i>KRAS</i> Q61H (0.50),<br><i>KRAS</i> Q61H (0.22) | NA                            | NA                              | IHC 3+             | PD   | Focal              | 4.29   |
| 7       | NA                                                  | E542K (0.03),<br>E545A (0.07) | NA                              | IHC 2+/ISH+        | NE   | Aneuploidy         | 2.90   |
| 8       | NA                                                  | E542K (0.03),<br>E545A (0.18) | L755S (0.40)                    | IHC 3+             | SD   | Focal              | 24.64  |
| 9       | NA                                                  | E545K (0.16)                  | NA                              | IHC 3+             | PR   | Focal              | 140.96 |
| 10      | NA                                                  | E545K (0.26),<br>Q46K (0.25)  | L755S (0.11)                    | IHC 3+             | PR   | Focal              | 30.99  |
| 11      | NA                                                  | NA                            | S310F (0.04)                    | IHC 3+             | PR   | Focal              | 12.49  |
| 12      | NA                                                  | NA                            | D769Y (81.02),<br>V777L (79.91) | IHC 2+/ISH+        | PD   | Focal              | 4.59   |
| 13      | NA                                                  | NA                            | G776V (79.24)                   | IHC3+              | PR   | Focal              | 5.62   |
| 14      | NA                                                  | NA                            | V777L (51.14)                   | IHC 2+/ISH+        | PR   | Focal              | 3.68   |
| 15      | NA                                                  | NA                            | L823del (0.01)                  | IHC3+              | SD   | Focal              | 77.46  |

Amp, amplification; ApCN, adjusted plasma copy number; CBOR, confirmed best overall response; del, deletion; *HER2*, human epidermal growth factor receptor 2; IHC, immunohistochemistry; ISH, in situ hybridization; NA, not applicable; NE, not evaluable; PD, progressive disease; PR, partial response; SD, stable disease; VAF, variant allele fraction.

**Supplementary Table S3.** List of investigators and study sites.

| <b>Country, Study Site</b>                     | <b>Principal Investigator</b> |
|------------------------------------------------|-------------------------------|
| <b>Japan</b>                                   |                               |
| Hokkaido University Hospital                   | Yoshito Komatsu               |
| National Cancer Center Hospital East           | Takayuki Yoshino              |
| The Cancer Institute Hospital of JFCR          | Kensei Yamaguchi              |
| Aichi Cancer Center Hospital                   | Toshiki Masuishi              |
| Kindai University Hospital                     | Hisato Kawakami               |
| Shikoku Cancer Center Hospital                 | Tomohiro Nishina              |
| Kyushu Cancer Center                           | Taito Esaki                   |
| <b>United States of America</b>                |                               |
| Mayo Clinic-Jacksonville (Mayo Florida)        | Jason Starr                   |
| MD Anderson Cancer Center, University of Texas | Kanwal Raghav                 |
| City of Hope Medical Center                    | Marwan Fakih                  |
| Vanderbilt University Medical Center           | Kristen Ciombor               |
| University of Southern California              | Heinz-Josef Lenz              |
| Karmanos Cancer Institute                      | Anthony Shields               |
| Greenville Health System Cancer Institute      | Ki Chung                      |
| UCLA Medical Center                            | Zev Wainberg                  |
| West Cancer Center                             | Axel Grothey                  |



| <b>Country, Study Site</b>                          | <b>Principal Investigator</b> |
|-----------------------------------------------------|-------------------------------|
| <b>Italy</b>                                        |                               |
| Fondazione IRCCS Istituto Nazionale dei Tumori      | Maria Di Bartolomeo           |
| Oncology Institute Veneto IOV-IRCCS                 | Fotios Loupakis               |
| ASST Grande Ospedale Metropolitano Niguarda         | Salvatore Siena               |
| Università degli studi della Campania L. Vanvitelli | Fortunato Ciardiello          |
| <b>Spain</b>                                        |                               |
| Hospital Universitari Clinic de Barcelona           | Joan Maurel Santasusana       |
| Hospital Universitari Vall d'Hebron                 | Elena Elez Fernandez          |
| Clinica Universidad de Navarra                      | Javier Rodriguez              |
| <b>United Kingdom</b>                               |                               |
| Royal Marsden Institute (Sutton)                    | Ian Chau                      |
| Royal Marsden Institute (Chelsea)                   | Ian Chau                      |

**Supplementary Table S4.** Additional data sharing information.

| <b>Data Sharing Questions</b>                                                | <b>Answers</b>                                                                                                                                                                                                                                                                                                                                                                                                                                                                                                                                                                                                                                          |
|------------------------------------------------------------------------------|---------------------------------------------------------------------------------------------------------------------------------------------------------------------------------------------------------------------------------------------------------------------------------------------------------------------------------------------------------------------------------------------------------------------------------------------------------------------------------------------------------------------------------------------------------------------------------------------------------------------------------------------------------|
| Will individual participant data be available (including data dictionaries)? | Yes                                                                                                                                                                                                                                                                                                                                                                                                                                                                                                                                                                                                                                                     |
| What data in particular will be made available?                              | Anonymized individual participant data (IPD) on completed studies and applicable supporting clinical trial documents may be available upon request at <a href="https://vivli.org/">https://vivli.org/</a> . In cases where clinical trial data and supporting documents are provided pursuant to our company policies and procedures, Daiichi Sankyo, Inc., will continue to protect the privacy of our clinical trial participants. Details on data sharing criteria and the procedure for requesting access can be found at this web address: <a href="https://vivli.org/ourmember/daiichi-sankyo/">https://vivli.org/ourmember/daiichi-sankyo/</a> . |
| What other documents will be available?                                      | Clinical Trial Protocol, Statistical Analysis Plan, Informed Consent Form, and Clinical Study Report. In cases where clinical trial data and supporting documents are provided pursuant to our company policies and procedures, Daiichi Sankyo will continue to protect the privacy of our clinical trial participants.                                                                                                                                                                                                                                                                                                                                 |
| When will data be available (start and end dates)?                           | Anonymized IPD will be available when indication supported receives marketing approvals and study results are published.                                                                                                                                                                                                                                                                                                                                                                                                                                                                                                                                |
| To whom will data be available?                                              | Qualified science and medical researchers upon formal request and submission of research proposal detailing planned analyses.                                                                                                                                                                                                                                                                                                                                                                                                                                                                                                                           |
| For what type of analyses?                                                   | De-identified IPD and relevant clinical trial documents will be shared for the purpose of conducting legitimate research as specified in an approved formal research proposal.                                                                                                                                                                                                                                                                                                                                                                                                                                                                          |
| By what mechanism will data be made available?                               | De-identified IPD will be available upon request at <a href="https://vivli.org/">https://vivli.org/</a> .                                                                                                                                                                                                                                                                                                                                                                                                                                                                                                                                               |
